# Supplementary material for: High-performance carbon nanotube network transistors fabricated using a hole punching technique
Source: Royal Society of Chemistry journal article supplement (doi:10.1039/c3tc30463a), 2013-01-01
Supplement: c3tc30463a.pdf [file c3tc30463a.pdf]

## Supplementary Informations for

### High-Performance Carbon Nanotube Network Transistors Fabricated Using a Hole Punching Technique

By *Won Jin Choi, Dong-Won Park, Serin Park, Du Won Jeong, Cheol-Soo Yang, Beom Soo Kim, Ju-Jin Kim* and *Jeong-O Lee*\*

[\*] W. J. Choi, D-W. Park, S. Park, Dr. C-S. Yang. Dr. J-O. Lee\*

Address line 1, Advanced Materials Division, Korea Research Institute of Chemical Technology (KRICT)

Address line 2, Daejeon, 305-343, South Korea

E-mail: [jolee@kRICT.re.kr](mailto:jolee@kRICT.re.kr)

D. W. Park, Prof. B. S. Kim

Address line 1, Department of Chemical Engineering, Chungbuk National University

Address line 2, Chungbuk, 361-763, South Korea

D. W. Jeong, Prof. J. -J. Kim

Address line 1, Department of Physics, Chonbuk National University

Address line 2, Jeonju, 561-756, South Korea

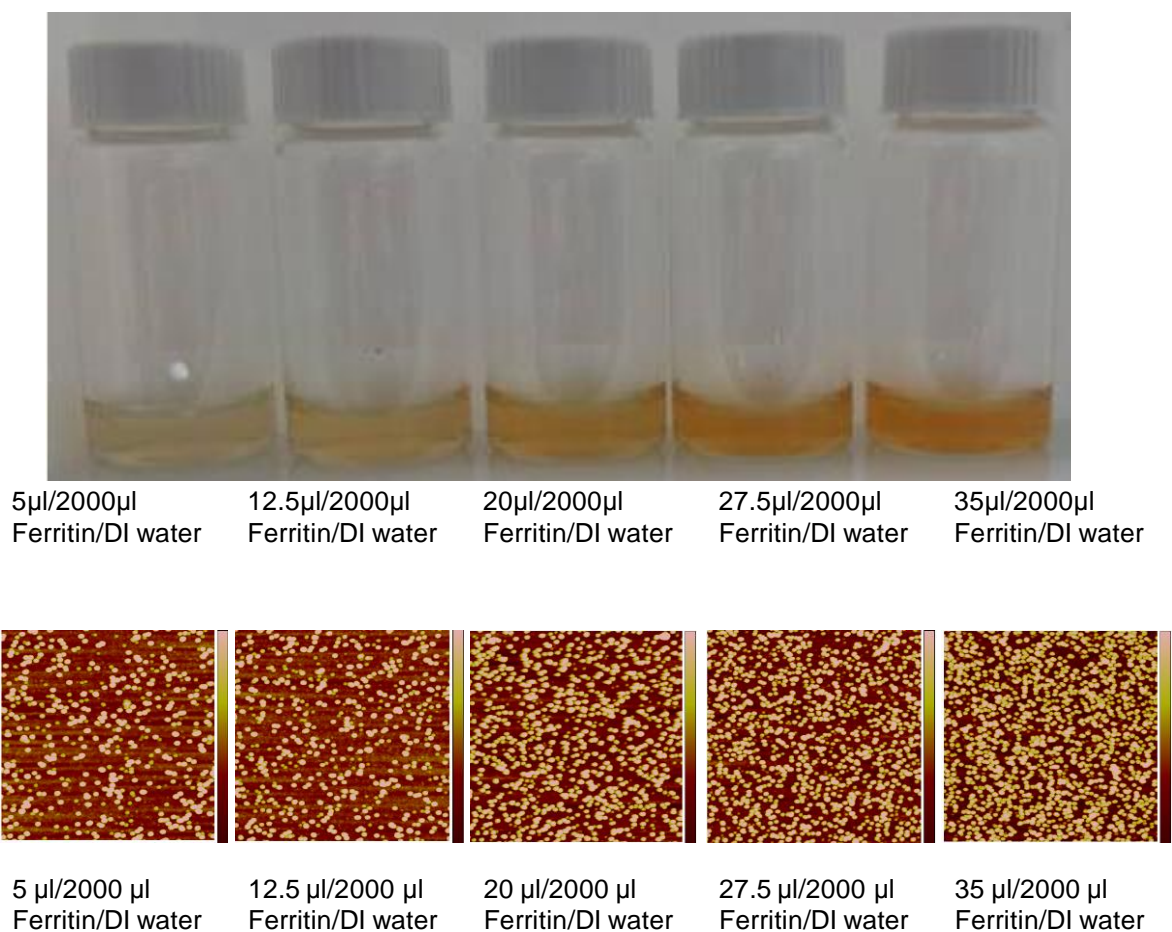

**Fig. S1.** AFM images of ferritin catalysts from various concentrations of ferritin.

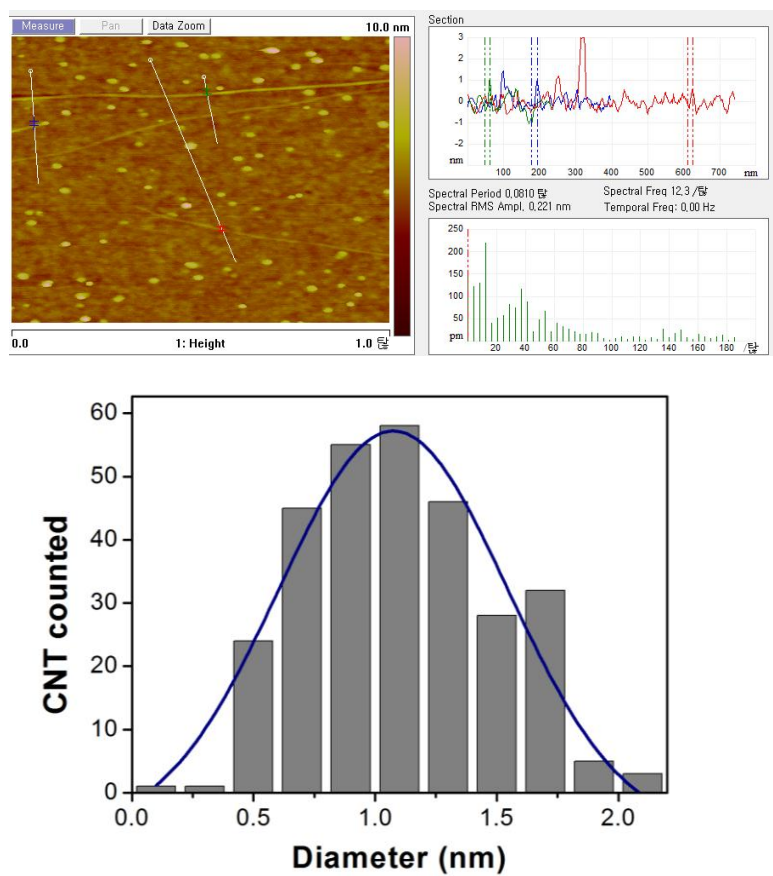

**Fig. S2.** Diameter distribution in SWNTs grown from ferritin as catalysts

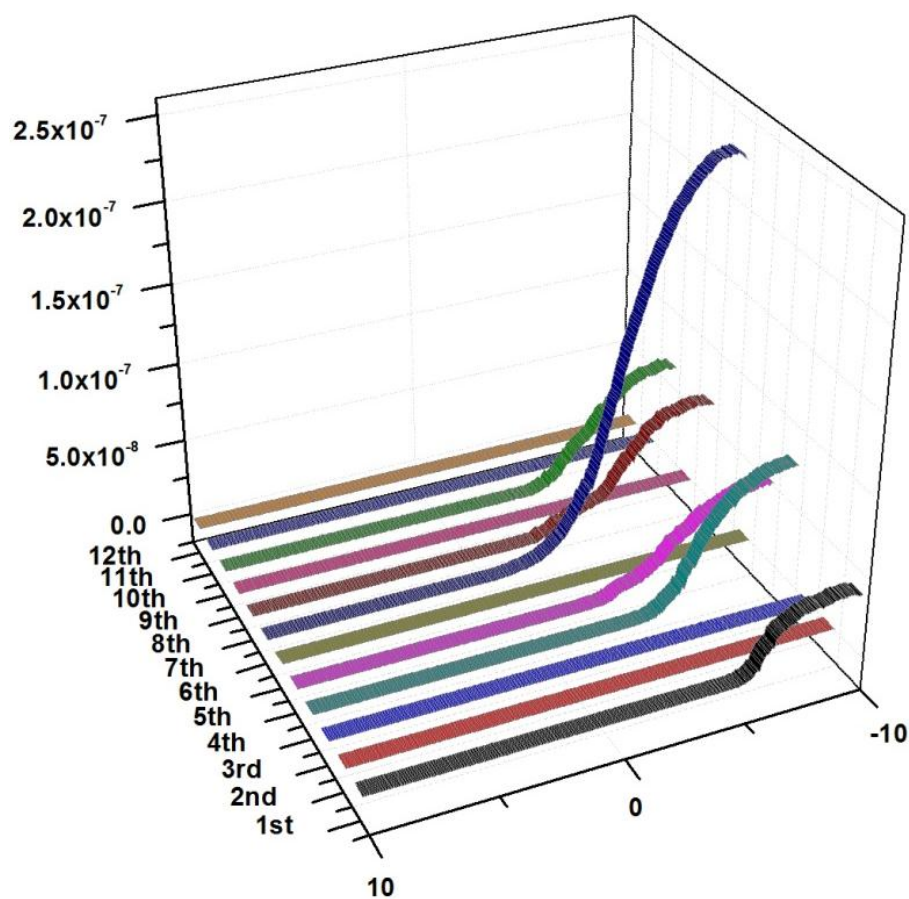

**Fig. S3.** Transfer curves measured from 12 low-density (below percolation threshold) SWNT-FETs. As shown in the figure, 6 devices out of 12 do not show measurable conductance.

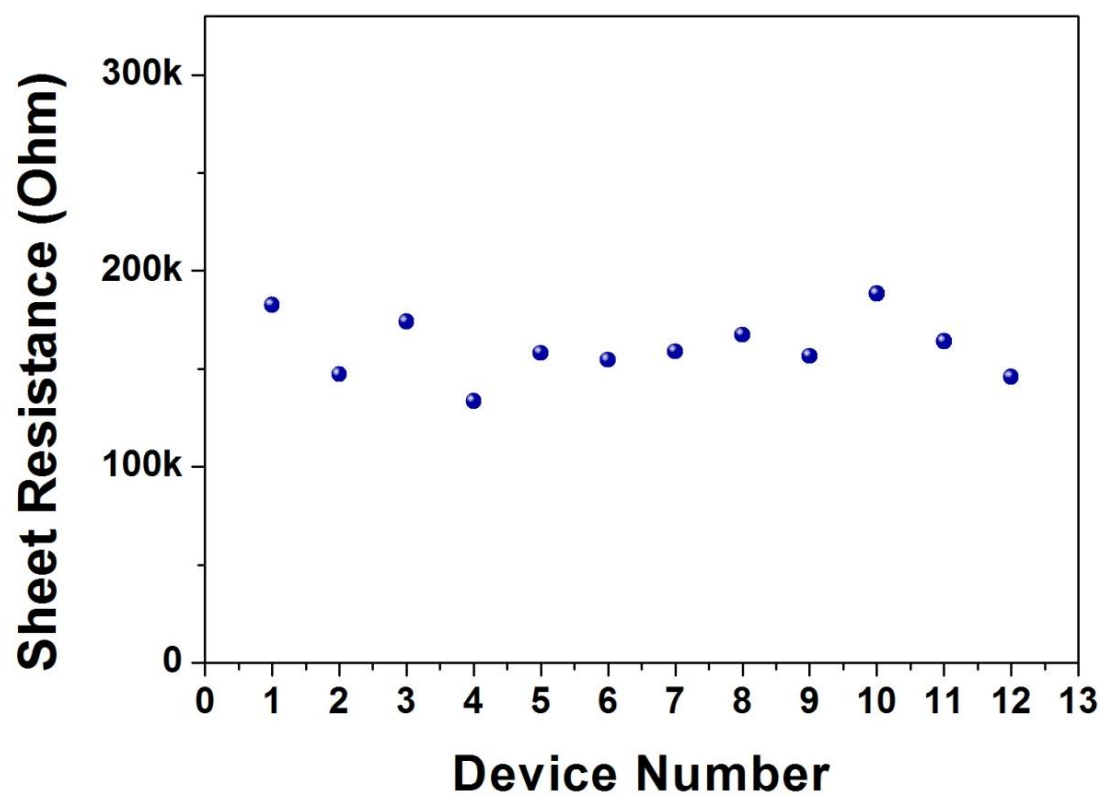

**Fig. S4.** Sheet resistance from SWNT networks with densities  $\sim 0.99/\mu\text{m}^2$  and lengths of  $1.42\mu\text{m}$ .
